# Supplementary material for: Molecular Oscillator Affects Susceptibility of Caterpillars to Insecticides: Studies on the Egyptian Cotton Leaf Worm—Spodoptera littoralis (Lepidoptera: Noctuidae)
Source: MDPI journal article supplement (doi:10.3390/insects13050488), 2022-05-23
Supplement: s1 [file s1]

Table S4A. Daily rhythm analysis of selected clock gene expressions in the larval midgut. The type of data (experimental groups and selected genes), method of analysis, and presentation of results in the table are the same as for Figure S3A.

| Organ  | Evaluated                          | Group             | P-value | F     | Robustness (%) | MESOR | Amplitude | Acrophase (° / ZT) |
|--------|------------------------------------|-------------------|---------|-------|----------------|-------|-----------|--------------------|
| midgut | <i>per</i> gene expression (mRNA)  | Intact            | p>0.05  | 4.69  | 55.29          | 84.61 | 13.74     | 267.61/17:50       |
|        |                                    | Buffer            | p>0.05  | 3.09  | 68.09          | 82.93 | 15.61     | 245.89/16:23       |
|        |                                    | Plant dsRNA       | p>0.05  | 6.39  | 78.03          | 81.88 | 12.89     | 233.80/15:35       |
|        |                                    | <i>per</i> dsRNA  | p>0.05  | 5.89  | 77.37          | 28.98 | 19.16     | 113.49/7:33        |
|        | <i>tim</i> gene expression (mRNA)  | Intact            | p<0.05  | 9.97  | 86.97          | 59.16 | 25.90     | 167.99/11:11       |
|        |                                    | Buffer            | p<0.05  | 9.68  | 91.05          | 55.67 | 24.32     | 168.58/11:14       |
|        |                                    | Plant dsRNA       | p<0.05  | 9.96  | 89.58          | 53.25 | 22.71     | 161.16/10:44       |
|        |                                    | <i>tim</i> dsRNA  | p>0.05  | 2.44  | 61.98          | 49.93 | 15.08     | 256.51/17:06       |
|        | <i>cry2</i> gene expression (mRNA) | Intact            | p<0.05  | 9.97  | 89.49          | 62.08 | 22.17     | 302.12/20:08       |
|        |                                    | Buffer            | p<0.05  | 10.47 | 90.89          | 65.96 | 20.51     | 310.29/20:41       |
|        |                                    | Plant dsRNA       | p<0.05  | 14.85 | 92.50          | 68.35 | 23.36     | 308.62/20:34       |
|        |                                    | <i>cry2</i> dsRNA | p>0.05  | 7.27  | 82.89          | 21.35 | 8.31      | 346.05/23:04       |
|        | <i>cyc</i> gene expression (mRNA)  | Intact            | p<0.05  | 14.50 | 89.01          | 70.26 | 13.98     | 88.67/5:54         |
|        |                                    | Buffer            | p<0.05  | 14.78 | 90.12          | 68.39 | 16.68     | 57.72/3:50         |
|        |                                    | Plant dsRNA       | p<0.05  | 14.50 | 90.00          | 70.48 | 17.58     | 70.42/4:41         |
|        |                                    | <i>cyc</i> dsRNA  | p>0.05  | 1.83  | 54.91          | 17.58 | 10.64     | 72.44/4:49         |
|        | <i>pdp1</i> gene expression (mRNA) | Intact            | p<0.05  | 11.52 | 90.32          | 40.09 | 25.51     | 306.29/20:25       |
|        |                                    | Buffer            | p<0.05  | 14.52 | 95.11          | 41.25 | 27.39     | 296.76/19:47       |
|        |                                    | Plant dsRNA       | p<0.05  | 11.71 | 93.29          | 41.23 | 19.66     | 280.03/18:40       |
|        |                                    | <i>pdp1</i> dsRNA | p>0.05  | 4.58  | 75.33          | 21.61 | 9.43      | 270.10/18:00       |
