# Supplementary material for: Molecular Oscillator Affects Susceptibility of Caterpillars to Insecticides: Studies on the Egyptian Cotton Leaf Worm—Spodoptera littoralis (Lepidoptera: Noctuidae)
Source: MDPI journal article supplement (doi:10.3390/insects13050488), 2022-05-23
Supplement: s1 [file s1]

| Gene         | GeneBank accession number | Primers for qPCR          |                            | Product size [bp] | Primers for dsRNA synthesis |                            | Product size [bp] |
|--------------|---------------------------|---------------------------|----------------------------|-------------------|-----------------------------|----------------------------|-------------------|
|              |                           | Sense                     | Antisense                  |                   | Sense                       | Antisense                  |                   |
| <i>per</i>   | EF364034.1                | CCGAACGAGGTGGTGG<br>TAAA  | GCCAAGGTACGGAACA<br>GACT   | 99                | CGCAACACCTTTGCATC<br>ACA    | TTTACCACCACCTCGTT<br>CGG   | 299               |
| <i>tim</i>   | FQ029930.1                | GAAGTCAAGCAGGCG<br>TCTA   | AACTTGCCTGGAGTCC<br>ACAG   | 94                | GGAGACCTGCTTCGCT<br>AAGAT   | CTGCGGTCCAGAAATG<br>AGGT   | 305               |
| <i>cry2</i>  | EF396286.1                | CAAGTGTATGCGCAAC<br>TCGC  | TTCGGACTTGGTGACG<br>ACTG   | 98                | GAGGTGCGATGTGGGT<br>AACT    | TGCAGCAGGAACCTCC<br>ATTT   | 300               |
| <i>cyc</i>   | ON052028                  | GTGGCCAACAACACGA<br>TCGT  | ACCTCCCTCTGCTTGT<br>CATGT  | 92                | GTGGCCAACAACACGA<br>TCGT    | TTCTGGTTGAAGACGG<br>CGTC   | 290               |
| <i>pdp1</i>  | ON052027                  | CCCCTCGAAGACAAG<br>AAAGAT | ACTTGAGATCGGGGTC<br>ATAGGG | 107               | TCTCAAGTACGCGGAC<br>CTAGAC  | CGGGACTTCTTGATCA<br>TTGGCT | 300               |
| <i>EF1-A</i> | HQ177154.1                | CGTACTCATTGTCGCC<br>GCTG  | CGAGTGTGAAAGCGAG<br>CAGA   | 95                | -                           | -                          | -                 |
| <i>SSU</i>   | M32419.1                  | -                         | -                          | -                 | GCCTCATTCCCTGTTTC<br>AAG    | AGCAAGGAACCCATCC<br>ATTT   | 292               |

Table S1. Information about the starters used in the experiments. The primers shown on the two columns on the left (orange) were used to study the daily expression profile of selected clock genes—*period* (*per*), *timeless* (*tim*), *cryptochrome 2* (*cry2*), *cycle* (*cyc*), *pdp1* (*PAR domain protein 1*)—and the *EF1-A* (*Elongation factor 1-alpha*) gene, which was used as a housekeeping standard for normalizing qRT-PCR results. The primers shown on the two columns on the right (purple) were used for *in vitro* synthesis (transcription) to generate dsRNAs used to knock out the expression of the same biological clock genes when injected to the larvae; primers for amplifying *SUU* (*ribulose-1,5-bisphosphate carboxylase small subunit*) of cultivated tobacco were used to produce non-specific (plant) dsRNA which was applied to the larvae in the control group. In addition, the GenBank accession numbers for studied genes and the sizes of products obtained from qRT-PCR and *in vitro* transcription (production of dsRNAs) are shown.
