# Supplementary material for: Molecular Oscillator Affects Susceptibility of Caterpillars to Insecticides: Studies on the Egyptian Cotton Leaf Worm—Spodoptera littoralis (Lepidoptera: Noctuidae)
Source: MDPI journal article supplement (doi:10.3390/insects13050488), 2022-05-23
Supplement: s1 [file s1]

Table S4B. Daily rhythm analysis of selected xenobiotic metabolizing enzymes in the larval midgut. The type of data (experimental groups and selected enzymes), method of analysis, and presentation of results in the table are the same as for Figure S3B.

| Organ  | Evaluated         | Group             | P-value | F         | Robustness (%) | MESOR   | Amplitude | Acrophase (° / ZT) |
|--------|-------------------|-------------------|---------|-----------|----------------|---------|-----------|--------------------|
| midgut | ECOD activity     | Intact            | p>0.05  | 0.00007   | 0.004          | 22.45   | 0.20      | 355.13/23:40       |
|        |                   | Buffer            | p>0.05  | 0.0001    | 0.01           | 22.48   | 0.27      | 19.59/1:18         |
|        |                   | Plant dsRNA       | p>0.05  | 0.00007   | 0.005          | 22.47   | 0.20      | 100.98/6:43        |
|        |                   | <i>per</i> dsRNA  | p>0.05  | 0.0000007 | 0.00005        | 21.49   | 0.02      | 134.75/8:58        |
|        |                   | <i>tim</i> dsRNA  | p>0.05  | 0.40      | 21.27          | 1.43    | 0.15      | 148.76/9:55        |
|        |                   | <i>cry2</i> dsRNA | p>0.05  | 0.48      | 24.28          | 2.73    | 0.14      | 143.28/9:33        |
|        |                   | <i>cyc</i> dsRNA  | p>0.05  | 2.77      | 64.88          | 0.16    | 0.03      | 276.87/18:27       |
|        |                   | <i>pdp1</i> dsRNA | p>0.05  | 0.15      | 8.94           | 0.28    | 0.06      | 56.99/3:47         |
|        | GST activity      | Intact            | p<0.05  | 15.05     | 90.94          | 273.41  | 186.98    | 255.99/17:03       |
|        |                   | Buffer            | p<0.05  | 10.50     | 87.50          | 303.32  | 169.32    | 259.63/17:18       |
|        |                   | Plant dsRNA       | p<0.05  | 10.80     | 87.81          | 272.78  | 155.96    | 257.09/17:08       |
|        |                   | <i>per</i> dsRNA  | p<0.05  | 9.77      | 80.16          | 484.69  | 74.17     | 254.85/16:59       |
|        |                   | <i>tim</i> dsRNA  | p<0.01  | 77.56     | 98.10          | 306.61  | 192.44    | 263.36/17:33       |
|        |                   | <i>cry2</i> dsRNA | p<0.05  | 10.08     | 87.04          | 432.69  | 172.38    | 276.41/18:25       |
|        |                   | <i>cyc</i> dsRNA  | p>0.05  | 1.93      | 56.26          | 101.98  | 25.01     | 29.81/1:59         |
|        |                   | <i>pdp1</i> dsRNA | p>0.05  | 0.88      | 36.91          | 59.39   | 12.42     | 261.69/17:26       |
|        | esterase activity | Intact            | p<0.05  | 9.66      | 82.94          | 804.88  | 317.64    | 294.16/19:36       |
|        |                   | Buffer            | p<0.05  | 9.89      | 82.19          | 837.82  | 205.13    | 291.75/19:26       |
|        |                   | Plant dsRNA       | p<0.05  | 10.49     | 88.54          | 770.42  | 317.86    | 290.71/19:22       |
|        |                   | <i>per</i> dsRNA  | p>0.05  | 1.20      | 44.46          | 1314.28 | 93.13     | 358.49/23:53       |
|        |                   | <i>tim</i> dsRNA  | p>0.05  | 3.60      | 70.61          | 1541.98 | 92.75     | 164.42/10:57       |
|        |                   | <i>cry2</i> dsRNA | p>0.05  | 2.62      | 63.57          | 1460.79 | 101.24    | 353.23/23:32       |
|        |                   | <i>cyc</i> dsRNA  | p>0.05  | 0.03      | 1.73           | 245.48  | 22.86     | 274.82/18:19       |
|        |                   | <i>pdp1</i> dsRNA | p>0.05  | 9.19      | 71.01          | 266.26  | 116.74    | 126.12/8:24        |
