# Supplementary material for: Molecular Oscillator Affects Susceptibility of Caterpillars to Insecticides: Studies on the Egyptian Cotton Leaf Worm—Spodoptera littoralis (Lepidoptera: Noctuidae)
Source: MDPI journal article supplement (doi:10.3390/insects13050488), 2022-05-23
Supplement: s1 [file s1]

Table S3B. Daily rhythm analysis of ECOD, GST, and esterase (xenobiotic metabolizing enzymes) activity in the fat body of LD reared larvae from eight groups—Intact, Buffer, Plant dsRNA, with each serving as a control; and one of five clock genes dsRNA (*per*, *tim*, *cry2*, *cyc* or *pdp1*); group names and description are the same as in the caption for Table S3A. Presented data are based on the calculation of changes in the enzymatic activity in the fat body over time that are made using the cosinor method, as it is described in caption for Figure S2. Daily changes in enzymatic activity was considered rhythmic in a statistically significant manner if the percentage of the rhythm was >50% and the  $p < 0.05$  for the zero-amplitude test.

| Organ    | Evaluated         | Group             | P-value | F     | Robustness (%) | MESOR  | Amplitude | Acrophase (° / ZT) |
|----------|-------------------|-------------------|---------|-------|----------------|--------|-----------|--------------------|
| fat body | ECOD activity     | Intact            | p<0.05  | 10.33 | 87.32          | 0.50   | 0.24      | 131.50/8:46        |
|          |                   | Buffer            | p<0.05  | 9.85  | 86.79          | 0.53   | 0.30      | 121.31/8:05        |
|          |                   | Plant dsRNA       | p<0.025 | 17.15 | 92.67          | 0.53   | 0.25      | 119.93/7:59        |
|          |                   | <i>per</i> dsRNA  | p>0.05  | 3.72  | 71.27          | 0.23   | 0.05      | 224.77/14:59       |
|          |                   | <i>tim</i> dsRNA  | p<0.05  | 10.35 | 84.77          | 0.47   | 0.18      | 137.99/9:11        |
|          |                   | <i>cry2</i> dsRNA | p<0.05  | 11.19 | 87.58          | 0.49   | 0.20      | 135.87/9:03        |
|          |                   | <i>cyc</i> dsRNA  | p>0.05  | 0.52  | 25.91          | 0.19   | 0.045     | 194.62/12:58       |
|          |                   | <i>pdp1</i> dsRNA | p>0.05  | 4.90  | 76.57          | 0.13   | 0.03      | 193.57/12:54       |
|          | GST activity      | Intact            | p<0.05  | 9.72  | 88.34          | 175.21 | 189.22    | 272.36/18:09       |
|          |                   | Buffer            | p<0.05  | 11.69 | 88.63          | 202.76 | 212.91    | 274.25/18:17       |
|          |                   | Plant dsRNA       | p<0.05  | 11.97 | 88.86          | 185.77 | 214.24    | 271.77/18:07       |
|          |                   | <i>per</i> dsRNA  | p>0.05  | 0.03  | 2.07           | 334.65 | 9.33      | 256.32/17:05       |
|          |                   | <i>tim</i> dsRNA  | p<0.05  | 13.94 | 78.39          | 191.04 | 242.31    | 274.13/18:16       |
|          |                   | <i>cry2</i> dsRNA | p<0.05  | 9.97  | 79.93          | 309.94 | 133.69    | 249.58/16:38       |
|          |                   | <i>cyc</i> dsRNA  | p>0.05  | 0.22  | 12.99          | 62.35  | 13.82     | 199.72/13:18       |
|          |                   | <i>pdp1</i> dsRNA | p>0.05  | 0.93  | 38.20          | 63.26  | 21.94     | 342.99/22:51       |
|          | esterase activity | Intact            | p>0.05  | 1.11  | 42.59          | 50.62  | 22.65     | 283.98/18:55       |
|          |                   | Buffer            | p>0.05  | 0.46  | 23.44          | 53.15  | 14.41     | 276.65/18:26       |
|          |                   | Plant dsRNA       | p>0.05  | 0.94  | 38.45          | 50.25  | 20.37     | 280.44/18:41       |
|          |                   | <i>per</i> dsRNA  | p>0.05  | 1.01  | 40.28          | 93.92  | 13.19     | 281.86/18:47       |
|          |                   | <i>tim</i> dsRNA  | p>0.05  | 0.36  | 19.52          | 82.44  | 11.15     | 319.84/21:19       |
|          |                   | <i>cry2</i> dsRNA | p>0.05  | 1.19  | 44.23          | 96.09  | 11.71     | 237.55/15:50       |
|          |                   | <i>cyc</i> dsRNA  | p>0.05  | 0.01  | 0.95           | 30.52  | 2.75      | 350.95/23:23       |
|          |                   | <i>pdp1</i> dsRNA | p>0.05  | 0.04  | 2.96           | 31.00  | 4.96      | 40.82/2:43         |
