# Supplementary material for: Molecular Oscillator Affects Susceptibility of Caterpillars to Insecticides: Studies on the Egyptian Cotton Leaf Worm—Spodoptera littoralis (Lepidoptera: Noctuidae)
Source: Insects. 2022 May 23;13(5):488. doi: 10.3390/insects13050488 (PMC9147166; doi:10.3390/insects13050488)
Supplement: Supplementary file 1 [file insects-13-00488-s001.zip]

Archive with 13 entries (13 files):
- Figure S1 ost.pdf
- Figure S2 ost.pdf
- Figure S3 ost.pdf
- Table S1 ost.pdf
- Table S2 ost.pdf
- Table S3A ost.pdf
- Table S3B ost.pdf
- Table S4A ost.pdf
- Table S4B ost.pdf
- Table S5A ost.pdf
- Table S5B ost.pdf
- Table S6 ost.pdf
- Text file S1 ost.pdf
